# Supplementary material for: TRIM37 Mediates Chemoresistance and Maintenance of Stemness in Pancreatic Cancer Cells via Ubiquitination of PTEN and Activation of the AKT–GSK-3β–β-Catenin Signaling Pathway
Source: Front Oncol. 2020 Oct 16;10:554787. doi: 10.3389/fonc.2020.554787 (PMC7651862; doi:10.3389/fonc.2020.554787)
Supplement: Supplementary file 3 [file Table_1.xls]

## Sheet: Sheet1
Clinical Epidemiology and Clinicopathologic Feature		TRIM37		p value
		low expression	high expression
all cases		51	59
age
	≤50	16	13	0.2676
	＞50	35	46
gender
	male	28	33	0.9137
	female	23	26
diameter of tumor
	≤2	34	18	0.0002
	＞2	17	41
pathological grading
	Ⅰ	4	0	0.0286
	Ⅱ	19	35
	Ⅲ	27	22
	Ⅳ	1	2
lymphatic metastasis
	N0	29	27	0.2455
	NI	22	32
distant metastasis
	M0	43	48	0.6824
	M1	8	11
NCCN clinical staging
	Ⅰ	23	14	0.0601
	Ⅱ	20	25
	Ⅲ	6	14
	Ⅳ	2	6
