# Supplementary material for: TRIM37 Mediates Chemoresistance and Maintenance of Stemness in Pancreatic Cancer Cells via Ubiquitination of PTEN and Activation of the AKT–GSK-3β–β-Catenin Signaling Pathway
Source: Front Oncol. 2020 Oct 16;10:554787. doi: 10.3389/fonc.2020.554787 (PMC7651862; doi:10.3389/fonc.2020.554787)
Supplement: Supplementary file 6 [file Table_4.xlsx]

## Sheet: Proteins
Protein FDR Confidence	Master	Description	Exp. q-value	Sum PEP Score	Coverage	# Peptides	# PSMs	# Unique Peptides	Modifications	Score Sequest HT	# Peptides Sequest HT
High	Master Protein	Myosin-9 OS=Homo sapiens OX=9606 GN=MYH9 PE=1 SV=4	0	1325.36	61.3776	146	778	123	Phospho [T630(96.6)]	2835.12	146
High	Master Protein	Plectin OS=Homo sapiens OX=9606 GN=PLEC PE=1 SV=3	0	1090.42	53.5226	241	566	227	Phospho [S4386(97.8)]	1776.63	241
High	Master Protein	Myosin-10 OS=Homo sapiens OX=9606 GN=MYH10 PE=1 SV=3	0	592.23	52.3785	100	249	77		844.364	100
High	Master Protein	Phosphatase and tensin homolog, OS=Homo sapiens OX=9606 GN=PTEN PE=1 SV=1	0	724.285	56.2526	169	256	95		1789.27	79
High	Master Protein	Spectrin alpha chain, non-erythrocytic 1 OS=Homo sapiens OX=9606 GN=SPTAN1 PE=1 SV=3	0	504.407	55.5016	117	192	117		599.143	117
High	Master Protein	Spectrin beta chain, non-erythrocytic 1 OS=Homo sapiens OX=9606 GN=SPTBN1 PE=1 SV=2	0	434.167	48.7733	100	182	100		500.757	100
High	Master Protein	Actin, cytoplasmic 1 OS=Homo sapiens OX=9606 GN=ACTB PE=1 SV=1	0	299.428	69.8667	23	368	10		1278.07	23
High	Master Protein	Unconventional myosin-VI OS=Homo sapiens OX=9606 GN=MYO6 PE=1 SV=1	0	259.022	50.4389	58	120	58		362.247	58
High	Master Protein	Keratin, type II cytoskeletal 8 OS=Homo sapiens OX=9606 GN=KRT8 PE=1 SV=7	0	236.066	59.6273	39	141	31		431.126	39
High	Master Protein	Alpha-actinin-4 OS=Homo sapiens OX=9606 GN=ACTN4 PE=1 SV=2	0	217.109	57.9583	46	99	32		297.447	46
High	Master Protein	Keratin, type I cytoskeletal 19 OS=Homo sapiens OX=9606 GN=KRT19 PE=1 SV=4	0	164.529	73.25	33	122	25		365.573	33
High	Master Protein	Keratin, type I cytoskeletal 18 OS=Homo sapiens OX=9606 GN=KRT18 PE=1 SV=2	0	151.745	56.2791	27	88	25		274.233	27
High	Master Protein	Unconventional myosin-Ic OS=Homo sapiens OX=9606 GN=MYO1C PE=1 SV=4	0	143.653	43.4619	38	75	38		217.083	38
High	Master Protein	Keratin, type II cytoskeletal 1 OS=Homo sapiens OX=9606 GN=KRT1 PE=1 SV=6	0	138.554	47.5155	32	64	25		194.067	32
High	Master Protein	Vimentin OS=Homo sapiens OX=9606 GN=VIM PE=1 SV=4	0	136.486	54.0773	28	54	27		165.57	28
High	Master Protein	Drebrin OS=Homo sapiens OX=9606 GN=DBN1 PE=1 SV=4	0	128.478	45.7627	19	50	19	Phospho [S142(100)]	180.145	19
High	Master Protein	Keratin, type I cytoskeletal 10 OS=Homo sapiens OX=9606 GN=KRT10 PE=1 SV=6	0	125.365	53.4247	29	59	26		189.755	29
High	Master Protein	Annexin A2 OS=Homo sapiens OX=9606 GN=ANXA2 PE=1 SV=2	0	121.258	55.4572	23	61	23		193.405	23
High	Master Protein	Tropomyosin alpha-3 chain OS=Homo sapiens OX=9606 GN=TPM3 PE=1 SV=1	0	117.71	61.2335	23	73	7		213.515	23
High	Master Protein	Gelsolin OS=Homo sapiens OX=9606 GN=GSN PE=1 SV=1	0	110.387	34.5269	23	54	17		191.035	23
High	Master Protein	Myosin-14 OS=Homo sapiens OX=9606 GN=MYH14 PE=1 SV=2	0	106.045	17.8947	28	77	8		246.783	28
High	Master Protein	Unconventional myosin-XVIIIa OS=Homo sapiens OX=9606 GN=MYO18A PE=1 SV=3	0	94.0621	20.3019	32	40	32		102.783	32
High	Master Protein	Unconventional myosin-Ib OS=Homo sapiens OX=9606 GN=MYO1B PE=1 SV=3	0	93.3339	26.1444	27	37	27		101.437	27
High	Master Protein	Keratin, type II cytoskeletal 2 epidermal OS=Homo sapiens OX=9606 GN=KRT2 PE=1 SV=2	0	90.826	43.662	28	43	19		120.345	28
High	Master Protein	Tropomyosin beta chain OS=Homo sapiens OX=9606 GN=TPM2 PE=1 SV=1	0	90.1525	55.6338	21	54	3		168.921	21
High	Master Protein	Keratin, type I cytoskeletal 9 OS=Homo sapiens OX=9606 GN=KRT9 PE=1 SV=3	0	89.0028	45.7464	22	38	21		108.604	22
High	Master Protein	Actin, alpha cardiac muscle 1 OS=Homo sapiens OX=9606 GN=ACTC1 PE=1 SV=1	0	85.6616	37.4005	14	200	3		525.484	14
High	Master Protein	Tropomyosin alpha-3 chain OS=Homo sapiens OX=9606 GN=TPM3 PE=1 SV=1	0	82.7695	47.0175	18	66	1		158.84	18
High	Master Protein	Myosin regulatory light chain 12A OS=Homo sapiens OX=9606 GN=MYL12A PE=1 SV=1	0	81.8064	61.0169	12	39	5		147.971	12
High	Master Protein	Tropomyosin 1 (Alpha), isoform CRA_o (Fragment) OS=Homo sapiens OX=9606 GN=TPM1 PE=1 SV=1	0	81.2747	37.6761	20	45	2		140.649	20
High	Master Protein	Beta tropomyosin isoform OS=Homo sapiens OX=9606 GN=TPM2 PE=2 SV=1	0	76.9121	45.4225	19	47	2		146.016	19
High	Master Protein	Tropomyosin 1 (Alpha), isoform CRA_m OS=Homo sapiens OX=9606 GN=TPM1 PE=1 SV=1	0	76.3119	55.2419	20	44	7		132.365	20
High	Master Protein	Tropomyosin alpha-4 chain OS=Homo sapiens OX=9606 GN=TPM4 PE=1 SV=3	0	76.1995	56.8548	18	47	8		139.824	18
High	Master Protein	Tropomodulin-3 OS=Homo sapiens OX=9606 GN=TMOD3 PE=1 SV=1	0	68.2977	55.6818	17	27	17		74.7309	17
High	Master Protein	Myosin-14 (Fragment) OS=Homo sapiens OX=9606 GN=MYH14 PE=1 SV=8	0	61.8247	22.0559	19	56	2		173.867	19
High	Master Protein	Myosin regulatory light polypeptide 9 OS=Homo sapiens OX=9606 GN=MYL9 PE=1 SV=4	0	61.5745	56.3953	9	27	2		102.789	9
High	Master Protein	Plectin (Fragment) OS=Homo sapiens OX=9606 GN=PLEC PE=1 SV=8	0	59.7213	53.7688	11	30	1		114.951	11
High	Master Protein	Heat shock cognate 71 kDa protein OS=Homo sapiens OX=9606 GN=HSPA8 PE=1 SV=1	0	59.1707	32.1981	15	21	12		63.6205	15
High	Master Protein	Unconventional myosin-Ie OS=Homo sapiens OX=9606 GN=MYO1E PE=1 SV=2	0	58.4254	22.0217	20	28	20		62.2352	20
High	Master Protein	Neuroblast differentiation-associated protein AHNAK OS=Homo sapiens OX=9606 GN=AHNAK PE=1 SV=2	0	56.3298	15.6876	24	25	24		58.466	24
High	Master Protein	Protein flightless-1 homolog OS=Homo sapiens OX=9606 GN=FLII PE=1 SV=2	0	54.8124	17.9669	20	25	20		62.2787	20
High	Master Protein	Myosin light polypeptide 6 OS=Homo sapiens OX=9606 GN=MYL6 PE=1 SV=1	0	54.3934	75.6579	9	35	7		109.362	9
High	Master Protein	Tubulin beta chain OS=Homo sapiens OX=9606 GN=TUBB PE=1 SV=2	0	52.5793	38.5135	12	27	3		78.1964	12
High	Master Protein	Alpha-actinin-1 OS=Homo sapiens OX=9606 GN=ACTN1 PE=1 SV=2	0	52.4961	20.7399	16	28	2		66.5865	16
High	Master Protein	Unconventional myosin-Va OS=Homo sapiens OX=9606 GN=MYO5A PE=1 SV=2	0	51.4655	13.1536	22	23	18		54.7791	22
High	Master Protein	Elongation factor 1-alpha 1 OS=Homo sapiens OX=9606 GN=EEF1A1 PE=1 SV=1	0	49.4214	34.1991	12	22	12		68.8057	12
High	Master Protein	Keratin, type I cytoskeletal 14 OS=Homo sapiens OX=9606 GN=KRT14 PE=1 SV=4	0	44.3073	30.0847	14	27	6		68.3755	14
High	Master Protein	LIM domain and actin-binding protein 1 OS=Homo sapiens OX=9606 GN=LIMA1 PE=1 SV=1	0	43.285	27.668	13	25	13	Phospho [S362(100); S490(100)]	60.091	13
High	Master Protein	Tubulin beta-4B chain OS=Homo sapiens OX=9606 GN=TUBB4B PE=1 SV=1	0	42.9711	28.9888	10	19	1		56.7256	10
High	Master Protein	Protein-L-isoaspartate O-methyltransferase OS=Homo sapiens OX=9606 GN=PCMT1 PE=1 SV=1	0	41.1533	50	11	19	11		49.9806	11
High	Master Protein	Tubulin alpha-1A chain OS=Homo sapiens OX=9606 GN=TUBA1A PE=1 SV=1	0	41.1398	33.4812	11	19	1		53.8025	11
High	Master Protein	E3 ubiquitin-protein ligase TRIM21 OS=Homo sapiens OX=9606 GN=TRIM21 PE=1 SV=1	0	40.7488	28.4211	14	19	14		54.9362	14
High	Master Protein	Keratin, type II cytoskeletal 5 OS=Homo sapiens OX=9606 GN=KRT5 PE=1 SV=3	0	40.7176	19.1525	16	22	7		53.46	16
High	Master Protein	Tubulin alpha-1B chain OS=Homo sapiens OX=9606 GN=TUBA1B PE=1 SV=1	0	40.3592	33.4812	11	19	1		54.1085	11
High	Master Protein	POTE ankyrin domain family member I OS=Homo sapiens OX=9606 GN=POTEI PE=3 SV=1	0	39.2968	6.4186	6	84	1	Phospho [Y918(100)]	228.108	6
High	Master Protein	X-ray repair cross-complementing protein 6 OS=Homo sapiens OX=9606 GN=XRCC6 PE=1 SV=2	0	38.6978	26.2726	14	15	14		36.8116	14
High	Master Protein	Tubulin beta-3 chain OS=Homo sapiens OX=9606 GN=TUBB3 PE=1 SV=2	0	38.2672	27.3333	9	19	1		55.7859	9
High	Master Protein	Keratin, type II cytoskeletal 6A OS=Homo sapiens OX=9606 GN=KRT6A PE=1 SV=3	0	37.2737	17.9078	14	22	1		50.121	14
High	Master Protein	Myosin-4 OS=Homo sapiens OX=9606 GN=MYH4 PE=2 SV=2	0	37.0223	4.74471	7	14	3		49.1112	7
High	Master Protein	POTE ankyrin domain family member J OS=Homo sapiens OX=9606 GN=POTEJ PE=3 SV=1	0	36.9482	5.78035	6	74	2		198.035	6
High	Master Protein	Keratin, type II cytoskeletal 6B OS=Homo sapiens OX=9606 GN=KRT6B PE=1 SV=5	0	34.4001	16.3121	13	20	0		45.9818	13
High	Master Protein	Alpha-enolase OS=Homo sapiens OX=9606 GN=ENO1 PE=1 SV=2	0	33.8529	34.3318	12	14	12		29.2302	12
High	Master Protein	Serum albumin OS=Homo sapiens OX=9606 GN=ALB PE=1 SV=2	0	31.7603	21.0181	11	17	11		38.3601	11
High	Master Protein	Heat shock protein HSP 90-beta OS=Homo sapiens OX=9606 GN=HSP90AB1 PE=1 SV=4	0	31.3808	16.4365	11	14	5		32.5842	11
High	Master Protein	Beta-actin-like protein 2 OS=Homo sapiens OX=9606 GN=ACTBL2 PE=1 SV=2	0	30.1462	14.0957	5	83	1	Phospho [T320(100)]	196.987	5
High	Master Protein	Leucine-rich repeat flightless-interacting protein 2 OS=Homo sapiens OX=9606 GN=LRRFIP2 PE=1 SV=1	0	28.8082	11.6505	8	10	8		29.8007	8
High	Master Protein	Clathrin heavy chain OS=Homo sapiens OX=9606 GN=CLTC PE=1 SV=1	0	27.8076	8.45742	8	8	8		26.3824	8
High	Master Protein	Nucleolin OS=Homo sapiens OX=9606 GN=NCL PE=1 SV=3	0	27.6391	18.169	10	13	10		36.9103	10
High	Master Protein	Histone H4 OS=Homo sapiens OX=9606 GN=HIST1H4A PE=1 SV=2	0	27.3814	43.6893	7	18	7		51.1333	7
High	Master Protein	Myosin-2 OS=Homo sapiens OX=9606 GN=MYH2 PE=1 SV=1	0	27.1954	3.40031	5	10	1		35.3928	5
High	Master Protein	Epiplakin OS=Homo sapiens OX=9606 GN=EPPK1 PE=1 SV=3	0	27.0022	3.14465	5	9	1		30.9783	5
High	Master Protein	Endoplasmic reticulum chaperone BiP OS=Homo sapiens OX=9606 GN=HSPA5 PE=1 SV=2	0	26.2431	20.3364	10	11	8		29.3804	10
High	Master Protein	Myosin-7 OS=Homo sapiens OX=9606 GN=MYH7 PE=1 SV=5	0	26.0486	4.44444	8	13	4		37.7388	8
High	Master Protein	Gelsolin (Fragment) OS=Homo sapiens OX=9606 GN=GSN PE=1 SV=1	0	24.9953	33.0769	7	14	1		45.5985	7
High	Master Protein	Actin-related protein 3 OS=Homo sapiens OX=9606 GN=ACTR3 PE=1 SV=3	0	23.5829	34.2105	9	10	9		25.6733	9
High	Master Protein	60S acidic ribosomal protein P0 OS=Homo sapiens OX=9606 GN=RPLP0 PE=1 SV=1	0	23.3495	32.1767	7	10	7		29.3104	7
High	Master Protein	5'-nucleotidase OS=Homo sapiens OX=9606 GN=NT5E PE=1 SV=1	0	22.4704	18.1185	9	11	9		24.2728	9
High	Master Protein	Prelamin-A/C OS=Homo sapiens OX=9606 GN=LMNA PE=1 SV=1	0	20.0129	14.759	9	11	9		21.4846	9
High	Master Protein	Aminopeptidase N OS=Homo sapiens OX=9606 GN=ANPEP PE=1 SV=4	0	19.5513	11.1686	8	8	8		16.5926	8
High	Master Protein	14-3-3 protein theta OS=Homo sapiens OX=9606 GN=YWHAQ PE=1 SV=1	0	18.8207	37.9592	7	7	5		18.4273	7
High	Master Protein	60S ribosomal protein L12 OS=Homo sapiens OX=9606 GN=RPL12 PE=1 SV=1	0	18.7885	49.0909	5	6	5		21.1423	5
High	Master Protein	Cofilin-1 OS=Homo sapiens OX=9606 GN=CFL1 PE=1 SV=1	0	18.4228	39.7059	5	5	5		16.7013	5
High	Master Protein	Heat shock protein HSP 90-alpha OS=Homo sapiens OX=9606 GN=HSP90AA1 PE=1 SV=5	0	17.7717	9.83607	7	9	2		21.4112	7
High	Master Protein	Histone H2B OS=Homo sapiens OX=9606 GN=HIST1H2BN PE=1 SV=1	0	16.8875	20.4819	4	10	2		29.4692	4
High	Master Protein	Myosin light chain 6B OS=Homo sapiens OX=9606 GN=MYL6B PE=1 SV=1	0	16.7113	26.4423	5	13	3		38.0212	5
High	Master Protein	Major vault protein OS=Homo sapiens OX=9606 GN=MVP PE=1 SV=4	0	15.0701	9.07055	7	7	7		11.0488	7
High	Master Protein	Stress-70 protein, mitochondrial OS=Homo sapiens OX=9606 GN=HSPA9 PE=1 SV=2	0	14.9662	11.6348	6	6	6		17.3438	6
High	Master Protein	Voltage-dependent anion-selective channel protein 1 OS=Homo sapiens OX=9606 GN=VDAC1 PE=1 SV=2	0	14.7347	26.1484	6	7	6		14.1927	6
High	Master Protein	Ubiquitin-40S ribosomal protein S27a OS=Homo sapiens OX=9606 GN=RPS27A PE=1 SV=2	0	14.0767	35.2564	6	9	6		17.4482	6
High	Master Protein	Ras GTPase-activating-like protein IQGAP1 OS=Homo sapiens OX=9606 GN=IQGAP1 PE=1 SV=1	0	13.6594	4.3452	6	6	6		8.58792	6
High	Master Protein	Heat shock 70 kDa protein 1B OS=Homo sapiens OX=9606 GN=HSPA1B PE=1 SV=1	0	13.4767	9.34579	5	6	3		15.7953	5
High	Master Protein	Histone H2B type 1-J OS=Homo sapiens OX=9606 GN=HIST1H2BJ PE=1 SV=3	0	13.3483	26.1905	3	7	1		20.8975	3
High	Master Protein	Histone H2A OS=Homo sapiens OX=9606 PE=3 SV=1	0	13.2966	27.0588	4	10	4		26.8267	4
High	Master Protein	Elongation factor 2 OS=Homo sapiens OX=9606 GN=EEF2 PE=1 SV=4	0	13.2271	8.62471	6	6	6		14.1792	6
High	Master Protein	Nexilin OS=Homo sapiens OX=9606 GN=NEXN PE=1 SV=1	0	13.2271	7.55556	5	5	5		12.2893	5
High	Master Protein	Nucleophosmin OS=Homo sapiens OX=9606 GN=NPM1 PE=1 SV=2	0	13.1891	18.7075	5	5	5		14.3571	5
High	Master Protein	60S ribosomal protein L7 OS=Homo sapiens OX=9606 GN=RPL7 PE=1 SV=1	0	13.1363	31.8548	7	7	7		15.9224	7
High	Master Protein	14-3-3 protein zeta/delta OS=Homo sapiens OX=9606 GN=YWHAZ PE=1 SV=1	0	12.6292	20.4082	4	4	2		12.0273	4
High	Master Protein	Keratin, type II cytoskeletal 7 OS=Homo sapiens OX=9606 GN=KRT7 PE=1 SV=5	0	12.3946	8.742	5	11	1		26.1454	5
High	Master Protein	Unconventional myosin-Vc OS=Homo sapiens OX=9606 GN=MYO5C PE=1 SV=2	0	12.354	4.64983	6	6	2		12.4501	6
High	Master Protein	60S ribosomal protein L10a OS=Homo sapiens OX=9606 GN=RPL10A PE=1 SV=2	0	12.3233	19.8157	5	8	5		19.0282	5
High	Master Protein	60S ribosomal protein L9 OS=Homo sapiens OX=9606 GN=RPL9 PE=1 SV=1	0	12.2874	23.9583	2	3	2		12.004	2
High	Master Protein	Coronin-1C OS=Homo sapiens OX=9606 GN=CORO1C PE=1 SV=1	0	11.6611	12.2363	4	4	4		14.0364	4
High	Master Protein	X-ray repair cross-complementing protein 5 OS=Homo sapiens OX=9606 GN=XRCC5 PE=1 SV=3	0	11.4751	7.78689	5	7	5		18.4359	5
High	Master Protein	60S ribosomal protein L5 OS=Homo sapiens OX=9606 GN=RPL5 PE=1 SV=3	0	11.0902	16.835	4	5	4		8.71135	4
High	Master Protein	Prohibitin-2 OS=Homo sapiens OX=9606 GN=PHB2 PE=1 SV=2	0	10.978	16.7224	4	4	4		10.0724	4
High	Master Protein	Zinc finger protein RFP OS=Homo sapiens OX=9606 GN=TRIM27 PE=1 SV=1	0	10.9605	7.21248	4	4	4		11.2262	4
High	Master Protein	Filamin-B OS=Homo sapiens OX=9606 GN=FLNB PE=1 SV=2	0	10.8942	3.11299	5	5	5		9.37996	5
High	Master Protein	Glycogen phosphorylase, brain form OS=Homo sapiens OX=9606 GN=PYGB PE=1 SV=5	0	10.8934	4.86358	3	3	3		9.57656	3
High	Master Protein	Mitochondrial import inner membrane translocase subunit TIM50 OS=Homo sapiens OX=9606 GN=TIMM50 PE=1 SV=2	0	10.7237	11.0482	3	3	3		9.25338	3
High	Master Protein	Heterogeneous nuclear ribonucleoproteins C1/C2 OS=Homo sapiens OX=9606 GN=HNRNPC PE=1 SV=4	0	10.5763	14.0523	4	4	4		9.394	4
High	Master Protein	60S ribosomal protein L22 OS=Homo sapiens OX=9606 GN=RPL22 PE=1 SV=2	0	10.527	39.0625	3	3	3		11.9906	3
High	Master Protein	Glyceraldehyde-3-phosphate dehydrogenase OS=Homo sapiens OX=9606 GN=GAPDH PE=1 SV=3	0	10.2303	8.35821	2	2	2		7.13525	2
High	Master Protein	60S ribosomal protein L10 OS=Homo sapiens OX=9606 GN=RPL10 PE=1 SV=4	0	10.0939	22.8972	3	3	3		9.19889	3
High	Master Protein	Actin-related protein 2 OS=Homo sapiens OX=9606 GN=ACTR2 PE=1 SV=1	0	10.0614	11.6751	4	5	4		9.67866	4
High	Master Protein	Annexin A5 OS=Homo sapiens OX=9606 GN=ANXA5 PE=1 SV=2	0	9.95627	11.25	3	3	3		7.93125	3
High	Master Protein	Caveolin-1 OS=Homo sapiens OX=9606 GN=CAV1 PE=1 SV=4	0	9.9139	30.8989	4	5	4		13.6463	4
High	Master Protein	Coatomer subunit alpha OS=Homo sapiens OX=9606 GN=COPA PE=1 SV=2	0	9.83581	4.00327	5	5	5		9.41771	5
High	Master Protein	Actin-related protein 2/3 complex subunit 3 OS=Homo sapiens OX=9606 GN=ARPC3 PE=1 SV=3	0	9.81856	19.6629	3	4	3		7.77782	3
High	Master Protein	Myosin-13 OS=Homo sapiens OX=9606 GN=MYH13 PE=2 SV=2	0	9.7215	1.80599	3	5	1		12.0749	3
High	Master Protein	60S ribosomal protein L8 OS=Homo sapiens OX=9606 GN=RPL8 PE=1 SV=2	0	9.68758	13.2296	3	5	3		14.6444	3
High	Master Protein	Keratin, type II cytoskeletal 74 OS=Homo sapiens OX=9606 GN=KRT74 PE=1 SV=1	0	9.55331	5.52486	5	6	1		11.4273	5
High	Master Protein	Galectin-1 OS=Homo sapiens OX=9606 GN=LGALS1 PE=1 SV=2	0	9.43309	32.5926	4	4	4		10.5182	4
High	Master Protein	Actin-related protein 2/3 complex subunit 1B OS=Homo sapiens OX=9606 GN=ARPC1B PE=1 SV=3	0	9.13182	16.3978	5	5	5		11.4458	5
High	Master Protein	L-lactate dehydrogenase A chain OS=Homo sapiens OX=9606 GN=LDHA PE=1 SV=2	0	8.83341	7.53012	2	2	2		6.53866	2
High	Master Protein	Heterogeneous nuclear ribonucleoprotein H OS=Homo sapiens OX=9606 GN=HNRNPH1 PE=1 SV=1	0	8.79183	13.1356	5	6	5		13.5307	5
High	Master Protein	Pyruvate kinase PKM OS=Homo sapiens OX=9606 GN=PKM PE=1 SV=4	0	8.64919	11.4878	4	4	4		10.4041	4
High	Master Protein	ADP/ATP translocase 2 OS=Homo sapiens OX=9606 GN=SLC25A5 PE=1 SV=7	0	8.57195	15.1007	5	6	5		9.27383	5
High	Master Protein	60S ribosomal protein L23a OS=Homo sapiens OX=9606 GN=RPL23A PE=1 SV=1	0	8.51917	17.0103	4	5	4		5.92179	4
High	Master Protein	CD59 glycoprotein OS=Homo sapiens OX=9606 PE=1 SV=1	0	8.45703	18.4615	2	6	2		13.0244	2
High	Master Protein	Peroxiredoxin-1 OS=Homo sapiens OX=9606 GN=PRDX1 PE=1 SV=1	0	8.35033	28.6432	5	7	5		11.3862	5
High	Master Protein	Endoplasmin OS=Homo sapiens OX=9606 GN=HSP90B1 PE=1 SV=1	0	8.14471	2.98879	2	2	1		7.53766	2
High	Master Protein	Actin-related protein 2/3 complex subunit 2 OS=Homo sapiens OX=9606 GN=ARPC2 PE=1 SV=1	0	7.92801	11.3333	3	3	3		7.67231	3
High	Master Protein	Protein RPL17-C18orf32 OS=Homo sapiens OX=9606 GN=RPL17-C18orf32 PE=3 SV=1	0	7.79748	17.5439	3	4	3		9.548	3
High	Master Protein	Protein S100-A9 OS=Homo sapiens OX=9606 GN=S100A9 PE=1 SV=1	0	7.59932	13.1579	1	2	1		6.33303	1
High	Master Protein	60S ribosomal protein L14 OS=Homo sapiens OX=9606 GN=RPL14 PE=1 SV=4	0	7.5369	11.1628	2	3	2		8.94196	2
High	Master Protein	General vesicular transport factor p115 OS=Homo sapiens OX=9606 GN=USO1 PE=1 SV=2	0	7.53051	2.59875	2	2	2		6.36391	2
High	Master Protein	Ras-related protein Rap-1b OS=Homo sapiens OX=9606 GN=RAP1B PE=1 SV=1	0	7.31714	18.4783	3	3	3		7.50847	3
High	Master Protein	rRNA 2'-O-methyltransferase fibrillarin OS=Homo sapiens OX=9606 GN=FBL PE=1 SV=2	0	7.31653	7.47664	2	2	2		6.00671	2
High	Master Protein	Serine/threonine-protein phosphatase OS=Homo sapiens OX=9606 GN=PPP1CC PE=1 SV=1	0	7.07279	9.33735	2	2	2		5.99267	2
High	Master Protein	Actin-related protein 2/3 complex subunit 4 OS=Homo sapiens OX=9606 GN=ARPC4-TTLL3 PE=3 SV=1	0	7.01279	14.9171	3	4	3		10.9439	3
High	Master Protein	60S ribosomal protein L18a OS=Homo sapiens OX=9606 GN=RPL18A PE=1 SV=2	0	6.9944	17.0455	3	3	3		5.64738	3
High	Master Protein	Chloride intracellular channel protein 1 OS=Homo sapiens OX=9606 GN=CLIC1 PE=1 SV=4	0	6.96328	17.4274	3	3	3		8.06558	3
High	Master Protein	Splicing factor, proline- and glutamine-rich OS=Homo sapiens OX=9606 GN=SFPQ PE=1 SV=2	0	6.8928	5.23338	2	2	2		3.36532	2
High	Master Protein	60S ribosomal protein L4 OS=Homo sapiens OX=9606 GN=RPL4 PE=1 SV=5	0	6.8917	7.96253	2	2	2		6.58124	2
High	Master Protein	Cell division control protein 42 homolog OS=Homo sapiens OX=9606 GN=CDC42 PE=1 SV=2	0	6.85689	14.6597	2	2	2		6.77465	2
High	Master Protein	Heterogeneous nuclear ribonucleoprotein Q OS=Homo sapiens OX=9606 GN=SYNCRIP PE=1 SV=2	0	6.81736	4.01284	2	2	2		4.98342	2
High	Master Protein	ATP synthase subunit alpha, mitochondrial OS=Homo sapiens OX=9606 GN=ATP5F1A PE=1 SV=1	0	6.66173	6.87161	3	3	3		8.13101	3
High	Master Protein	Integrin beta-1 OS=Homo sapiens OX=9606 GN=ITGB1 PE=1 SV=2	0	6.55556	4.51128	3	3	3		6.25674	3
High	Master Protein	40S ribosomal protein S8 OS=Homo sapiens OX=9606 GN=RPS8 PE=1 SV=2	0	6.12529	15.8654	3	3	3		7.68633	3
High	Master Protein	Heterogeneous nuclear ribonucleoprotein A1 OS=Homo sapiens OX=9606 GN=HNRNPA1 PE=1 SV=5	0	6.08933	8.60215	3	4	3		6.55402	3
High	Master Protein	Eukaryotic initiation factor 4A-II OS=Homo sapiens OX=9606 GN=EIF4A2 PE=1 SV=2	0	5.91025	5.89681	2	2	2		5.33217	2
High	Master Protein	Protein S100-A11 OS=Homo sapiens OX=9606 GN=S100A11 PE=1 SV=2	0	5.90904	15.2381	1	1	1		4.53067	1
High	Master Protein	Glucose-6-phosphate 1-dehydrogenase OS=Homo sapiens OX=9606 GN=G6PD PE=1 SV=4	0	5.90114	5.04854	3	3	3		6.25334	3
High	Master Protein	60 kDa heat shock protein, mitochondrial OS=Homo sapiens OX=9606 GN=HSPD1 PE=1 SV=2	0	5.86674	5.93368	2	2	2		5.85262	2
High	Master Protein	Heterogeneous nuclear ribonucleoprotein U OS=Homo sapiens OX=9606 GN=HNRNPU PE=1 SV=6	0	5.86008	3.51515	2	2	2		5.58334	2
High	Master Protein	Cytochrome b5 type B (Outer mitochondrial membrane), isoform CRA_a OS=Homo sapiens OX=9606 GN=CYB5B PE=1 SV=1	0	5.71512	22.6667	1	1	1		5.89219	1
High	Master Protein	60S ribosomal protein L3 OS=Homo sapiens OX=9606 GN=RPL3 PE=1 SV=2	0	5.65088	8.18859	3	3	3		7.82283	3
High	Master Protein	60S ribosomal protein L23 OS=Homo sapiens OX=9606 GN=RPL23 PE=1 SV=1	0	5.60119	14.2857	1	1	1		3.86663	1
High	Master Protein	ATP-dependent RNA helicase A OS=Homo sapiens OX=9606 GN=DHX9 PE=1 SV=4	0	5.5151	1.5748	2	2	2		4.47374	2
High	Master Protein	Capping protein (Actin filament) muscle Z-line, beta, isoform CRA_d OS=Homo sapiens OX=9606 GN=CAPZB PE=1 SV=1	0	5.49398	8.9701	2	2	2		5.02718	2
High	Master Protein	Polypyrimidine tract-binding protein 1 OS=Homo sapiens OX=9606 GN=PTBP1 PE=1 SV=1	0	5.43512	6.80272	2	2	2		6.59698	2
High	Master Protein	60S ribosomal protein L30 OS=Homo sapiens OX=9606 GN=RPL30 PE=1 SV=2	0	5.43135	19.1304	2	2	2		4.83214	2
High	Master Protein	Elongation factor 1-gamma OS=Homo sapiens OX=9606 GN=EEF1G PE=1 SV=3	0	5.34597	8.23799	3	3	3		4.57288	3
High	Master Protein	40S ribosomal protein S20 OS=Homo sapiens OX=9606 GN=RPS20 PE=1 SV=1	0	5.33055	15.1261	2	2	2		5.71988	2
High	Master Protein	40S ribosomal protein S16 OS=Homo sapiens OX=9606 GN=RPS16 PE=1 SV=2	0	5.3235	21.9178	3	4	3		9.05294	3
High	Master Protein	40S ribosomal protein S3 OS=Homo sapiens OX=9606 GN=RPS3 PE=1 SV=2	0	5.32221	18.5185	4	4	4		10.2621	4
High	Master Protein	Sperm-specific antigen 2 OS=Homo sapiens OX=9606 GN=SSFA2 PE=1 SV=3	0	5.32183	2.06513	2	2	2		5.42918	2
High	Master Protein	Nucleolar RNA helicase 2 OS=Homo sapiens OX=9606 GN=DDX21 PE=1 SV=5	0	5.31702	3.32056	2	2	2		3.40303	2
High	Master Protein	F-actin-capping protein subunit alpha-1 OS=Homo sapiens OX=9606 GN=CAPZA1 PE=1 SV=3	0	5.31234	11.8881	2	3	2		8.89104	2
High	Master Protein	Elongation factor Tu, mitochondrial OS=Homo sapiens OX=9606 GN=TUFM PE=1 SV=2	0	5.232	4.42478	2	2	2		5.05514	2
High	Master Protein	Calmodulin-2 OS=Homo sapiens OX=9606 GN=CALM2 PE=1 SV=1	0	5.11759	16.8367	2	2	2		6.93908	2
High	Master Protein	Fascin OS=Homo sapiens OX=9606 GN=FSCN1 PE=1 SV=3	0	5.03472	5.88235	2	2	2		6.18064	2
High	Master Protein	T-complex protein 1 subunit alpha OS=Homo sapiens OX=9606 GN=TCP1 PE=1 SV=1	0	5.02867	4.4964	2	2	2		5.59879	2
High	Master Protein	Sarcoplasmic/endoplasmic reticulum calcium ATPase 2 OS=Homo sapiens OX=9606 GN=ATP2A2 PE=1 SV=1	0	5.02755	4.7025	4	4	4		8.95268	4
High	Master Protein	EF-hand domain-containing protein D1 OS=Homo sapiens OX=9606 GN=EFHD1 PE=1 SV=1	0	5.00021	9.62343	2	2	2		4.78513	2
High	Master Protein	Peptidyl-prolyl cis-trans isomerase A OS=Homo sapiens OX=9606 GN=PPIA PE=1 SV=2	0	4.74531	10.9091	2	2	2		4.31632	2
High	Master Protein	60S ribosomal protein L11 OS=Homo sapiens OX=9606 GN=RPL11 PE=1 SV=2	0	4.73863	12.9213	2	3	2		8.56349	2
High	Master Protein	Probable ATP-dependent RNA helicase DDX41 (Fragment) OS=Homo sapiens OX=9606 GN=DDX41 PE=1 SV=1	0	4.73138	4.84375	2	2	2		5.77388	2
High	Master Protein	Heterogeneous nuclear ribonucleoproteins A2/B1 OS=Homo sapiens OX=9606 GN=HNRNPA2B1 PE=1 SV=2	0	4.69406	6.51558	2	2	2		4.04475	2
High	Master Protein	Myoferlin OS=Homo sapiens OX=9606 GN=MYOF PE=1 SV=1	0	4.57563	1.50412	2	2	2		2.59636	2
High	Master Protein	Caveolae-associated protein 1 OS=Homo sapiens OX=9606 GN=CAVIN1 PE=1 SV=1	0	4.51467	7.4359	2	2	2		6.03538	2
High	Master Protein	60S ribosomal protein L13 OS=Homo sapiens OX=9606 GN=RPL13 PE=1 SV=4	0	4.45161	9.00474	2	3	2		7.12308	2
High	Master Protein	Histone H3 OS=Homo sapiens OX=9606 GN=HIST2H3PS2 PE=1 SV=1	0	4.42041	17.6471	3	7	3		13.4272	3
High	Master Protein	Uncharacterized protein (Fragment) OS=Homo sapiens OX=9606 PE=4 SV=2	0	4.41024	9.2827	2	2	2		5.3369	2
High	Master Protein	Leucine-rich repeat flightless-interacting protein 1 OS=Homo sapiens OX=9606 GN=LRRFIP1 PE=1 SV=2	0	4.39073	1.73267	1	1	1		3.22096	1
High	Master Protein	Aspartate--tRNA ligase, cytoplasmic OS=Homo sapiens OX=9606 GN=DARS PE=1 SV=2	0	4.31943	5.38922	2	2	2		4.86848	2
High	Master Protein	60S ribosomal protein L26 OS=Homo sapiens OX=9606 GN=RPL26 PE=1 SV=1	0	4.2998	11.0345	2	2	2		4.7651	2
High	Master Protein	40S ribosomal protein S5 OS=Homo sapiens OX=9606 GN=RPS5 PE=1 SV=1	0	4.21846	10.2222	2	2	2		4.87355	2
High	Master Protein	Coronin-1B OS=Homo sapiens OX=9606 GN=CORO1B PE=1 SV=1	0	4.19906	4.29448	2	2	2		2.55757	2
High	Master Protein	Protein S100-A10 OS=Homo sapiens OX=9606 GN=S100A10 PE=1 SV=2	0	4.15385	17.5258	1	1	1		3.23424	1
High	Master Protein	40S ribosomal protein S3a OS=Homo sapiens OX=9606 GN=RPS3A PE=1 SV=2	0	4.15179	8.33333	2	2	2		2.76123	2
High	Master Protein	60S ribosomal protein L24 OS=Homo sapiens OX=9606 GN=RPL24 PE=1 SV=1	0	4.12298	10.828	2	2	2		4.73882	2
High	Master Protein	Serine/arginine-rich splicing factor 3 OS=Homo sapiens OX=9606 GN=SRSF3 PE=1 SV=1	0	4.09361	18.2927	2	2	2		4.72762	2
High	Master Protein	Fructose-bisphosphate aldolase OS=Homo sapiens OX=9606 GN=ALDOA PE=1 SV=1	0	4.07022	5.70652	2	2	2		4.41598	2
High	Master Protein	High mobility group protein HMG-I/HMG-Y OS=Homo sapiens OX=9606 GN=HMGA1 PE=1 SV=3	0	3.90111	23.3645	2	2	2		3.90827	2
High	Master Protein	60S ribosomal protein L13a (Fragment) OS=Homo sapiens OX=9606 GN=RPL13A PE=1 SV=2	0	3.85293	8.09524	2	2	2		2.60978	2
High	Master Protein	40S ribosomal protein S13 OS=Homo sapiens OX=9606 GN=RPS13 PE=1 SV=2	0	3.83289	11.2583	2	2	2		4.77775	2
High	Master Protein	Annexin A1 OS=Homo sapiens OX=9606 GN=ANXA1 PE=1 SV=2	0	3.71245	5.78035	2	2	2		2.37042	2
High	Master Protein	60S ribosomal protein L27 OS=Homo sapiens OX=9606 GN=RPL27 PE=1 SV=2	0	3.68929	21.3235	2	2	2		5.30968	2
High	Master Protein	THO complex subunit 4 OS=Homo sapiens OX=9606 GN=ALYREF PE=1 SV=1	0	3.54076	4.16667	1	2	1		5.50393	1
High	Master Protein	Prohibitin OS=Homo sapiens OX=9606 GN=PHB PE=1 SV=1	0	3.48667	6.61765	2	2	2		2.1876	2
High	Master Protein	Nascent polypeptide-associated complex subunit alpha, muscle-specific form OS=Homo sapiens OX=9606 GN=NACA PE=1 SV=1	0	3.41737	0.721848	1	1	1		2.88932	1
High	Master Protein	Poly [ADP-ribose] polymerase 1 OS=Homo sapiens OX=9606 GN=PARP1 PE=1 SV=4	0	3.41533	1.28205	1	1	1		2.80756	1
High	Master Protein	Guanine nucleotide-binding protein G(I)/G(S)/G(T) subunit beta-1 OS=Homo sapiens OX=9606 GN=GNB1 PE=1 SV=3	0	3.32495	6.17647	2	2	2		4.15081	2
High	Master Protein	FAS-associated factor 2 OS=Homo sapiens OX=9606 GN=FAF2 PE=1 SV=2	0	3.27671	2.69663	1	1	1		0	1
High	Master Protein	MICOS complex subunit MIC60 OS=Homo sapiens OX=9606 GN=IMMT PE=1 SV=1	0	3.20026	2.77045	2	2	2		1.87414	2
High	Master Protein	Phosphate carrier protein, mitochondrial OS=Homo sapiens OX=9606 GN=SLC25A3 PE=1 SV=2	0	3.13775	4.97238	2	2	2		4.12382	2
High	Master Protein	Ribonuclease inhibitor OS=Homo sapiens OX=9606 GN=RNH1 PE=1 SV=2	0	3.09909	3.2538	1	1	1		2.36672	1
High	Master Protein	Phosphoglycerate mutase 1 OS=Homo sapiens OX=9606 GN=PGAM1 PE=1 SV=2	0	3.09034	5.51181	1	1	1		2.69443	1
High	Master Protein	Single-stranded DNA-binding protein, mitochondrial OS=Homo sapiens OX=9606 GN=SSBP1 PE=1 SV=1	0	3.05404	10.1351	1	1	1		3.18809	1
High	Master Protein	Guanine nucleotide-binding protein G(s) subunit alpha isoforms XLas OS=Homo sapiens OX=9606 GN=GNAS PE=1 SV=2	0	2.91973	1.06075	1	1	1		2.74416	1
High	Master Protein	60S ribosomal protein L35 OS=Homo sapiens OX=9606 GN=RPL35 PE=1 SV=2	0	2.91364	8.13008	1	1	1		2.32361	1
High	Master Protein	BAG family molecular chaperone regulator 2 OS=Homo sapiens OX=9606 GN=BAG2 PE=1 SV=1	0	2.85511	5.21327	1	1	1		2.95798	1
High	Master Protein	Translocon-associated protein subunit delta OS=Homo sapiens OX=9606 GN=SSR4 PE=1 SV=1	0	2.84863	6.35838	1	1	1		2.7513	1
High	Master Protein	40S ribosomal protein S26 OS=Homo sapiens OX=9606 GN=RPS26 PE=1 SV=3	0	2.84285	13.0435	1	1	1		2.74807	1
High	Master Protein	Sulfide:quinone oxidoreductase, mitochondrial OS=Homo sapiens OX=9606 GN=SQOR PE=1 SV=1	0	2.81559	2.66667	1	1	1		2.88743	1
High	Master Protein	HLA class I histocompatibility antigen, Cw-6 alpha chain OS=Homo sapiens OX=9606 GN=HLA-C PE=1 SV=1	0	2.80382	6.04534	1	1	1		4.30737	1
High	Master Protein	Destrin OS=Homo sapiens OX=9606 GN=DSTN PE=1 SV=3	0	2.74232	6.66667	1	1	1		2.70358	1
High	Master Protein	60S ribosomal protein L35a OS=Homo sapiens OX=9606 GN=RPL35A PE=1 SV=2	0	2.71899	14.5455	2	3	2		2.1366	2
High	Master Protein	RPS10-NUDT3 readthrough OS=Homo sapiens OX=9606 GN=RPS10-NUDT3 PE=4 SV=1	0	2.71625	3.09278	1	1	1		2.47268	1
High	Master Protein	40S ribosomal protein S11 OS=Homo sapiens OX=9606 GN=RPS11 PE=1 SV=3	0	2.64981	16.4557	2	2	2		4.33843	2
High	Master Protein	Chymotrypsin-like elastase family member 1 OS=Homo sapiens OX=9606 GN=CELA1 PE=1 SV=2	0	2.63339	4.65116	1	1	1		2.99384	1
High	Master Protein	Cytochrome c oxidase subunit 2 OS=Homo sapiens OX=9606 GN=MT-CO2 PE=1 SV=1	0	2.54031	4.40529	1	1	1		2.12697	1
High	Master Protein	ATP-binding cassette sub-family D member 3 OS=Homo sapiens OX=9606 GN=ABCD3 PE=1 SV=1	0	2.52768	2.12443	1	1	1		2.10698	1
High	Master Protein	Dolichyl-diphosphooligosaccharide--protein glycosyltransferase subunit 1 OS=Homo sapiens OX=9606 GN=RPN1 PE=1 SV=1	0	2.51399	1.64745	1	1	1		2.00997	1
High	Master Protein	Uncharacterized protein OS=Homo sapiens OX=9606 PE=4 SV=1	0	2.5123	5.95238	1	1	1		2.50279	1
High	Master Protein	40S ribosomal protein S18 OS=Homo sapiens OX=9606 GN=RPS18 PE=1 SV=3	0	2.51201	5.26316	1	2	1		1.91016	1
High	Master Protein	Splicing factor U2AF 65 kDa subunit OS=Homo sapiens OX=9606 GN=U2AF2 PE=1 SV=4	0	2.42829	2.10526	1	1	1		1.9033	1
High	Master Protein	cDNA FLJ57527, highly similar to 60S ribosomal protein L31 OS=Homo sapiens OX=9606 GN=RPL31 PE=1 SV=1	0	2.35335	13.0769	2	2	2		4.06242	2
High	Master Protein	60S ribosomal protein L7a OS=Homo sapiens OX=9606 GN=RPL7A PE=1 SV=2	0	2.35067	4.13534	1	1	1		2.50857	1
High	Master Protein	Transmembrane emp24 domain-containing protein 10 OS=Homo sapiens OX=9606 GN=TMED10 PE=1 SV=2	0	2.34075	4.10959	1	1	1		2.24183	1
High	Master Protein	Very-long-chain (3R)-3-hydroxyacyl-CoA dehydratase 3 OS=Homo sapiens OX=9606 GN=HACD3 PE=1 SV=2	0	2.33857	5.8011	1	1	1		2.2822	1
High	Master Protein	Dermcidin OS=Homo sapiens OX=9606 GN=DCD PE=1 SV=2	0	2.33536	10	1	1	1		2.71756	1
High	Master Protein	Glyceraldehyde-3-phosphate dehydrogenase, testis-specific OS=Homo sapiens OX=9606 GN=GAPDHS PE=1 SV=2	0	2.29783	2.69608	1	2	1		5.13872	1
High	Master Protein	Dihydrolipoyllysine-residue acetyltransferase component of pyruvate dehydrogenase complex, mitochondrial OS=Homo sapiens OX=9606 GN=DLAT PE=1 SV=3	0	2.29166	1.39104	1	1	1		2.03934	1
High	Master Protein	60S ribosomal protein L19 OS=Homo sapiens OX=9606 GN=RPL19 PE=1 SV=1	0	2.28425	4.59184	1	2	1		3.90943	1
High	Master Protein	Fragile X mental retardation syndrome-related protein 1 OS=Homo sapiens OX=9606 GN=FXR1 PE=1 SV=3	0	2.27197	1.77134	1	1	1		0	1
High	Master Protein	40S ribosomal protein S25 OS=Homo sapiens OX=9606 GN=RPS25 PE=1 SV=1	0	2.271	8	1	1	1		2.48701	1
High	Master Protein	PDZ domain-containing protein GIPC1 OS=Homo sapiens OX=9606 GN=GIPC1 PE=1 SV=2	0	2.24803	4.8048	1	1	1		2.80118	1
High	Master Protein	Calnexin OS=Homo sapiens OX=9606 GN=CANX PE=1 SV=2	0	2.17967	3.20946	1	1	1		2.29397	1
High	Master Protein	Interleukin enhancer-binding factor 3 OS=Homo sapiens OX=9606 GN=ILF3 PE=1 SV=3	0	2.15952	1.11857	1	1	1		2.00572	1
High	Master Protein	Caveolin-2 OS=Homo sapiens OX=9606 GN=CAV2 PE=1 SV=2	0	2.1479	20.9877	2	2	2		2.88719	2
High	Master Protein	Immunoglobulin heavy constant gamma 3 (Fragment) OS=Homo sapiens OX=9606 GN=IGHG3 PE=1 SV=1	0	2.12501	1.56951	1	4	1		7.79451	1
High	Master Protein	Voltage-dependent anion-selective channel protein 2 OS=Homo sapiens OX=9606 GN=VDAC2 PE=1 SV=2	0	2.11182	3.40136	1	1	1		2.38581	1
High	Master Protein	ATP synthase subunit beta, mitochondrial OS=Homo sapiens OX=9606 GN=ATP5F1B PE=1 SV=3	0	2.0805	1.89036	1	1	1		2.28259	1
High	Master Protein	Heat shock protein beta-1 OS=Homo sapiens OX=9606 GN=HSPB1 PE=1 SV=2	0	2.06223	4.87805	1	1	1		2.62803	1
High	Master Protein	Putative 60S ribosomal protein L37a-like protein OS=Homo sapiens OX=9606 GN=RPL37AP8 PE=5 SV=2	0	1.9987	8.60215	1	1	1		1.90546	1
High	Master Protein	Brain acid soluble protein 1 OS=Homo sapiens OX=9606 GN=BASP1 PE=1 SV=2	0	1.96497	6.1674	1	1	1		1.62171	1
High	Master Protein	Profilin OS=Homo sapiens OX=9606 GN=PFN2 PE=1 SV=1	0	1.94654	7.44681	1	1	1		2.352	1
High	Master Protein	Ras-related protein Rab-1A OS=Homo sapiens OX=9606 GN=RAB1A PE=1 SV=3	0	1.92849	3.90244	1	1	1		1.78285	1
High	Master Protein	Proliferation-associated protein 2G4 OS=Homo sapiens OX=9606 GN=PA2G4 PE=1 SV=3	0	1.91293	4.31472	1	1	1		2.02604	1
High	Master Protein	Nucleoside diphosphate kinase A OS=Homo sapiens OX=9606 GN=NME1 PE=1 SV=1	0	1.9108	7.89474	1	1	1		0	1
High	Master Protein	Plasminogen activator inhibitor 1 RNA-binding protein OS=Homo sapiens OX=9606 GN=SERBP1 PE=1 SV=2	0	1.90974	2.20588	1	1	1		2.32157	1
High	Master Protein	Cytoskeleton-associated protein 4 OS=Homo sapiens OX=9606 GN=CKAP4 PE=1 SV=2	0	1.89963	2.99003	1	1	1		2.04436	1
High	Master Protein	Fibrinogen beta chain OS=Homo sapiens OX=9606 GN=FGB PE=1 SV=2	0	1.88773	3.86965	1	1	1		2.91733	1
High	Master Protein	Calcium/calmodulin-dependent protein kinase type II subunit gamma OS=Homo sapiens OX=9606 GN=CAMK2G PE=1 SV=4	0	1.86487	2.32975	1	1	1		0	1
High	Master Protein	40S ribosomal protein S14 OS=Homo sapiens OX=9606 GN=RPS14 PE=1 SV=3	0	1.86138	6.62252	1	1	1		0	1
High	Master Protein	Uncharacterized protein OS=Homo sapiens OX=9606 PE=3 SV=1	0	1.84436	4.7619	1	1	1		2.51884	1
High	Master Protein	Nuclease-sensitive element-binding protein 1 (Fragment) OS=Homo sapiens OX=9606 GN=YBX1 PE=1 SV=1	0	1.83003	5.08021	1	1	1		3.37685	1
High	Master Protein	Receptor of-activated protein C kinase 1 (Fragment) OS=Homo sapiens OX=9606 GN=RACK1 PE=1 SV=1	0	1.80244	4.98442	1	1	1		2.04012	1
High	Master Protein	Protein disulfide-isomerase A3 OS=Homo sapiens OX=9606 GN=PDIA3 PE=1 SV=4	0	1.79588	2.17822	1	1	1		2.24076	1
High	Master Protein	Emerin OS=Homo sapiens OX=9606 GN=EMD PE=1 SV=1	0	1.78463	6.69291	1	1	1		2.3384	1
High	Master Protein	Apolipoprotein A-I OS=Homo sapiens OX=9606 GN=APOA1 PE=1 SV=1	0	1.78146	5.61798	1	1	1		2.48628	1
High	Master Protein	B-cell receptor-associated protein 31 OS=Homo sapiens OX=9606 GN=BCAP31 PE=1 SV=3	0	1.72492	3.65854	1	1	1		1.98984	1
High	Master Protein	Protein FAM83H OS=Homo sapiens OX=9606 GN=FAM83H PE=1 SV=3	0	1.72331	1.35708	1	1	1		2.5037	1
High	Master Protein	Heterogeneous nuclear ribonucleoprotein D0 OS=Homo sapiens OX=9606 GN=HNRNPD PE=1 SV=1	0	1.68319	3.94366	1	1	1		2.54155	1
High	Master Protein	Delta(3,5)-Delta(2,4)-dienoyl-CoA isomerase, mitochondrial OS=Homo sapiens OX=9606 GN=ECH1 PE=1 SV=2	0	1.62342	2.13415	1	1	1		1.96961	1
High	Master Protein	Monocarboxylate transporter 4 OS=Homo sapiens OX=9606 GN=SLC16A3 PE=1 SV=1	0	1.58536	2.7957	1	1	1		2.23021	1
High	Master Protein	Spliceosome RNA helicase DDX39B OS=Homo sapiens OX=9606 GN=DDX39B PE=1 SV=1	0	1.58004	2.33645	1	1	1		0	1
High	Master Protein	RNA-binding protein 25 OS=Homo sapiens OX=9606 GN=RBM25 PE=1 SV=3	0	1.57349	2.13523	1	1	1		2.13658	1
High	Master Protein	RUN and FYVE domain-containing protein 2 (Fragment) OS=Homo sapiens OX=9606 GN=RUFY2 PE=1 SV=1	0	1.55909	1.77419	1	1	1		0	1
High	Master Protein	Neurabin-2 OS=Homo sapiens OX=9606 GN=PPP1R9B PE=1 SV=1	0	1.54	2.08078	1	1	1		2.52343	1
High	Master Protein	Core histone macro-H2A.1 OS=Homo sapiens OX=9606 GN=H2AFY PE=1 SV=4	0	1.5388	2.41935	1	1	1		1.73898	1
High	Master Protein	Erlin-1 OS=Homo sapiens OX=9606 GN=ERLIN1 PE=1 SV=1	0	1.52172	4.04624	1	1	1		2.00313	1
High	Master Protein	Profilin (Fragment) OS=Homo sapiens OX=9606 GN=PFN1 PE=1 SV=1	0	1.50724	7.27273	1	1	1		1.89332	1
High	Master Protein	ADP-ribosylation factor 4 OS=Homo sapiens OX=9606 GN=ARF4 PE=1 SV=3	0	1.50073	3.88889	1	1	1		1.9755	1
High	Master Protein	Dedicator of cytokinesis protein 7 OS=Homo sapiens OX=9606 GN=DOCK7 PE=1 SV=4	0	1.4916	0.46729	1	1	1		0	1
High	Master Protein	GTP-binding protein Di-Ras2 OS=Homo sapiens OX=9606 GN=DIRAS2 PE=1 SV=1	0.00131148	1.4598	5.52764	1	1	1		1.89422	1
High	Master Protein	40S ribosomal protein S12 OS=Homo sapiens OX=9606 GN=RPS12 PE=1 SV=3	0.00131148	1.44105	7.57576	1	1	1		2.1785	1
High	Master Protein	Myeloid-associated differentiation marker OS=Homo sapiens OX=9606 GN=MYADM PE=1 SV=2	0.00131148	1.43676	1.86335	1	1	1		0	1
High	Master Protein	Protein disulfide-isomerase OS=Homo sapiens OX=9606 GN=P4HB PE=1 SV=3	0.00131148	1.43239	1.9685	1	1	1		2.18187	1
High	Master Protein	60S ribosomal protein L36 OS=Homo sapiens OX=9606 GN=RPL36 PE=1 SV=3	0.00131148	1.41061	9.52381	1	1	1		2.36757	1
High	Master Protein	Polyadenylate-binding protein 4 OS=Homo sapiens OX=9606 GN=PABPC4 PE=1 SV=1	0.00131148	1.40384	2.32919	1	1	1		2.38102	1
High	Master Protein	Copine-7 OS=Homo sapiens OX=9606 GN=CPNE7 PE=1 SV=1	0.00131148	1.3711	1.4218	1	1	1		2.36264	1
High	Master Protein	Ras-related protein Rab-11B OS=Homo sapiens OX=9606 GN=RAB11B PE=1 SV=4	0.00192061	1.34795	3.66972	1	1	1		0	1
High	Master Protein	Protein NipSnap homolog 2 OS=Homo sapiens OX=9606 GN=NIPSNAP2 PE=1 SV=1	0.00192061	1.33414	2.0979	1	1	1		0	1
High	Master Protein	40S ribosomal protein S19 OS=Homo sapiens OX=9606 GN=RPS19 PE=1 SV=2	0.00192061	1.3279	7.58621	1	1	1		0	1
High	Master Protein	Histone H1.5 OS=Homo sapiens OX=9606 GN=HIST1H1B PE=1 SV=3	0.00192061	1.31506	5.30973	1	1	1		1.69263	1
High	Master Protein	60S ribosomal protein L28 OS=Homo sapiens OX=9606 GN=RPL28 PE=1 SV=1	0.00192061	1.30303	6.47059	1	1	1		0	1
High	Master Protein	Proliferating cell nuclear antigen OS=Homo sapiens OX=9606 GN=PCNA PE=1 SV=1	0.00192061	1.26938	3.06513	1	1	1		1.82467	1
High	Master Protein	UDP-glucose 6-dehydrogenase OS=Homo sapiens OX=9606 GN=UGDH PE=1 SV=1	0.00638162	1.19525	2.63158	1	1	1		2.35614	1
Medium	Master Protein	Retinoic acid receptor alpha OS=Homo sapiens OX=9606 GN=RARA PE=1 SV=1	0.0107595	1.13936	3.13808	1	1	1	Phospho [T214(100)]	2.18516	1
Medium	Master Protein	Ferritin heavy chain OS=Homo sapiens OX=9606 GN=FTH1 PE=1 SV=2	0.0107595	1.12419	3.82514	1	1	1		0	1
Medium	Master Protein	Beta-2-microglobulin OS=Homo sapiens OX=9606 GN=B2M PE=1 SV=1	0.0107595	1.12171	8.40336	1	1	1		0	1
Medium	Master Protein	Retinoic acid-induced protein 3 OS=Homo sapiens OX=9606 GN=GPRC5A PE=1 SV=2	0.0113422	1.1152	1.68067	1	2	1		0	1
Medium	Master Protein	Receptor-type tyrosine-protein phosphatase kappa OS=Homo sapiens OX=9606 GN=PTPRK PE=1 SV=1	0.0113422	1.11311	0.883152	1	1	1		0	1
Medium	Master Protein	Programmed cell death protein 6 OS=Homo sapiens OX=9606 GN=PDCD6 PE=1 SV=1	0.0123916	1.10568	3.14136	1	1	1		1.75703	1
Medium	Master Protein	Netrin-G2 OS=Homo sapiens OX=9606 GN=NTNG2 PE=1 SV=2	0.0123916	1.08061	2.83019	1	1	1	Phospho [S279(96.9)]	0	1
Medium	Master Protein	Peptidyl-prolyl cis-trans isomerase B OS=Homo sapiens OX=9606 GN=PPIB PE=1 SV=2	0.0123916	1.07376	2.77778	1	1	1		0	1
Medium	Master Protein	Activated RNA polymerase II transcriptional coactivator p15 OS=Homo sapiens OX=9606 GN=SUB1 PE=1 SV=3	0.0141626	1.0567	4.72441	1	1	1		1.65372	1
Medium	Master Protein	Myelin-oligodendrocyte glycoprotein (Fragment) OS=Homo sapiens OX=9606 GN=MOG PE=1 SV=1	0.0141626	1.04015	5.02793	1	1	1	Acetyl [N-Term]	0	1
Medium	Master Protein	40S ribosomal protein S7 OS=Homo sapiens OX=9606 GN=RPS7 PE=1 SV=1	0.0147511	1.0284	4.12371	1	1	1		2.42966	1
Medium	Master Protein	Leucine-rich repeat-containing protein 59 OS=Homo sapiens OX=9606 GN=LRRC59 PE=1 SV=1	0.0159607	1.02114	3.90879	1	1	1		2.05313	1
Medium	Master Protein	Conserved oligomeric Golgi complex subunit 4 OS=Homo sapiens OX=9606 GN=COG4 PE=1 SV=1	0.0275229	1.00436	1.90114	1	1	1	Phospho [S735(100); T739(100)]	0	1
Medium	Master Protein	DNA-dependent protein kinase catalytic subunit OS=Homo sapiens OX=9606 GN=PRKDC PE=1 SV=3	0.0292505	1.00235	0.193798	1	1	1		0	1
Medium	Master Protein	Fc receptor-like protein 2 OS=Homo sapiens OX=9606 GN=FCRL2 PE=1 SV=1	0.0292505	1.00152	2.16535	1	1	1	Phospho [S203(96.9)]	0	1
Medium	Master Protein	Dolichyl-diphosphooligosaccharide--protein glycosyltransferase subunit 2 OS=Homo sapiens OX=9606 GN=RPN2 PE=1 SV=3	0.0296431	0.969805	1.42631	1	1	1		0	1
Medium	Master Protein	Radixin OS=Homo sapiens OX=9606 GN=RDX PE=4 SV=1	0.0296431	0.950782	1.52542	1	1	1		1.67926	1
Medium	Master Protein	Prolactin-inducible protein OS=Homo sapiens OX=9606 GN=PIP PE=1 SV=1	0.0308343	0.937042	7.53425	1	1	1		0	1
Medium	Master Protein	Fibrinogen gamma chain OS=Homo sapiens OX=9606 GN=FGG PE=1 SV=1	0.0325105	0.92775	2.60304	1	1	1		0	1
Medium	Master Protein	Kinesin-like protein KIF27 OS=Homo sapiens OX=9606 GN=KIF27 PE=2 SV=1	0.0435561	0.872247	0.499643	1	1	1		1.78651	1
Medium	Master Protein	Caspase recruitment domain-containing protein 11 OS=Homo sapiens OX=9606 GN=CARD11 PE=1 SV=3	0.0477042	0.852015	1.7331	1	2	1		0	1
